# Supplementary material for: Preparation of hybrid mesoporous silica luminescent nanoparticles with lanthanide(iii) complexes and their exhibition of white emission
Source: Royal Society of Chemistry journal article supplement (doi:10.1039/c1dt10779h), 2011-01-01
Supplement: c1dt10779h.pdf [file c1dt10779h.pdf]

# Preparation of Hybrid Mesoporous Silica Luminescent Nanoparticles with Lanthanide(III) Complexes and Their Exhibition to White Emission

Daojun Zhang, Duihai Tang, Xuemin Wang, Zhen-an Qiao, Yantao Li, Yunling Liu, Qisheng Huo\*

*The State Key Laboratory of Inorganic Synthesis and Preparative Chemistry,  
College of Chemistry, Jilin University, Changchun 130012, P. R. China*

---

\* Corresponding author. Tel: +86-431-85168602. Fax: +86-431-85168624.

E-mail: [huoqisheng@jlu.edu.cn](mailto:huoqisheng@jlu.edu.cn).

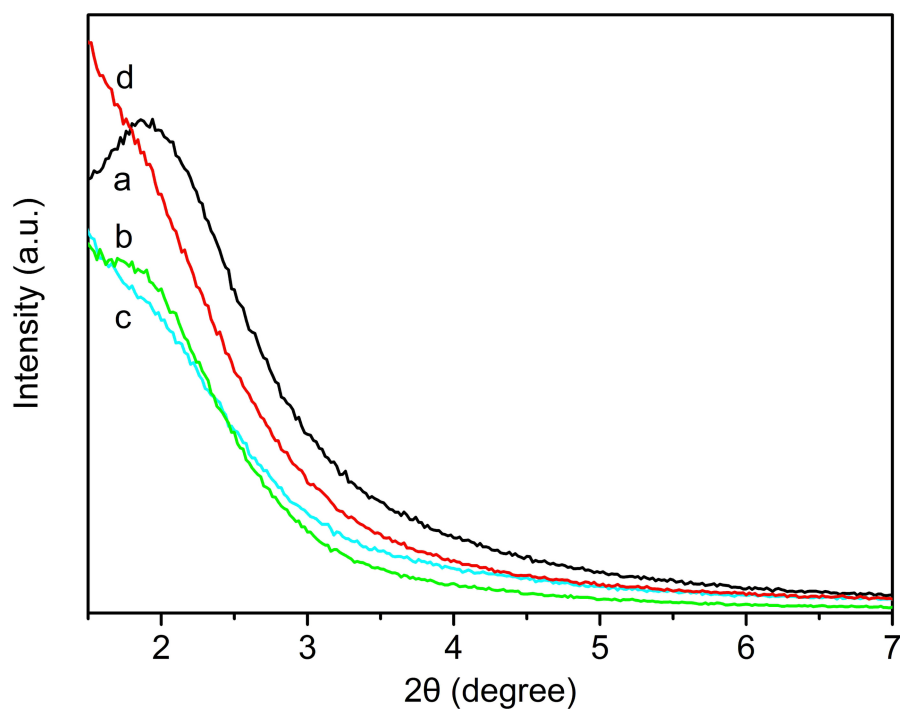

Figure S1. XRD patterns of surfactant-extracted MSNs (a), dpa-Si- MSNs (b), Eu-dpa-Si- MSNs (c), and Tb-dpa-Si-MSNs (d).

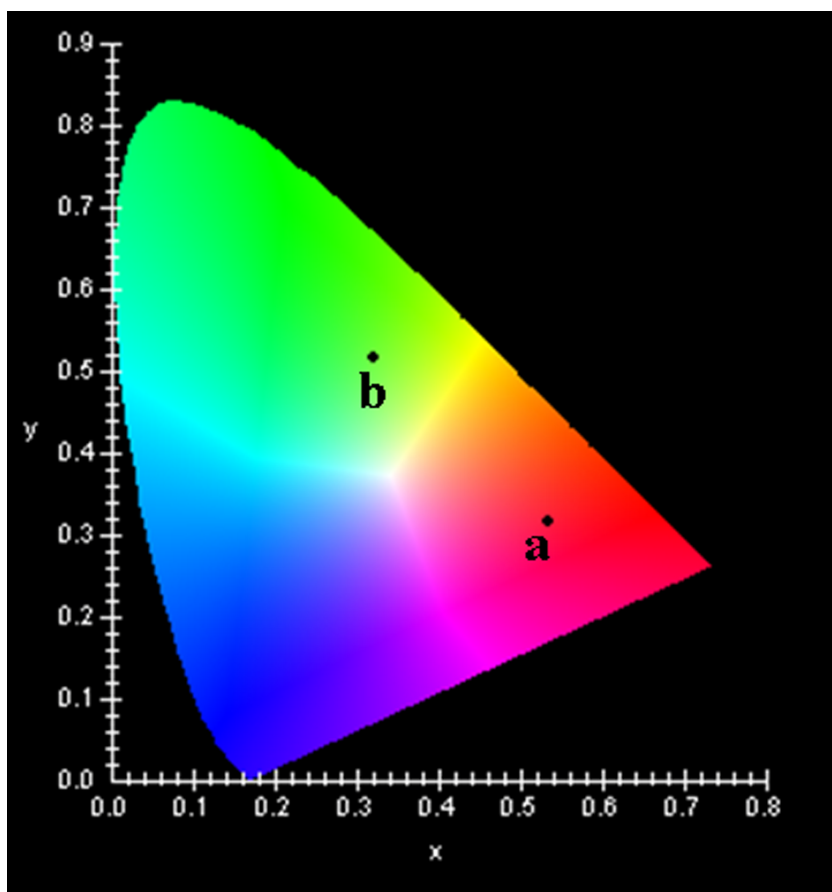

Figure S2. CIE (1931) (x, y) chromaticity diagram showing the emission color coordinates of Eu-dpa-Si-MSNs (a) and Tb-dpa-Si-MSNs (b).

Table S1. The chromaticity coordination of Eu-dpa-Si-MSNs and Tb-dpa-Si-MSNs after heat treatment with excitation wavelengths varied from 254 to 374 nm (the step is 10 nm).

| $\lambda_{\text{ex}}$ | Eu-dpa-Si-MSNs |        | Tb-dpa-Si-MSNs |        |
|-----------------------|----------------|--------|----------------|--------|
|                       | x              | y      | x              | y      |
| 244                   | 0.3378         | 0.3672 | 0.3200         | 0.3811 |
| 254                   | 0.3475         | 0.3779 | 0.3287         | 0.3869 |
| 264                   | 0.3567         | 0.3875 | 0.3381         | 0.3963 |
| 274                   | 0.3640         | 0.3947 | 0.3453         | 0.4045 |
| 284                   | 0.3687         | 0.3984 | 0.3496         | 0.4065 |
| 294                   | 0.3718         | 0.4011 | 0.3516         | 0.4054 |
| 304                   | 0.3717         | 0.4004 | 0.3522         | 0.4050 |
| 314                   | 0.3713         | 0.3984 | 0.3525         | 0.4037 |
| 324                   | 0.3705         | 0.397  | 0.3486         | 0.3968 |
| 334                   | 0.3670         | 0.3918 | 0.3463         | 0.3932 |
| 344                   | 0.3630         | 0.3872 | 0.3424         | 0.3552 |
| 354                   | 0.3593         | 0.3832 | 0.3382         | 0.3789 |
| 364                   | 0.3549         | 0.3808 | 0.3343         | 0.3744 |
